# Supplementary material for: Chloroform-selective vapochromic behavior based on crystal-state host–guest complexation of an organic cage
Source: Royal Society of Chemistry journal article supplement (doi:10.1039/d3ce00882g), 2023-01-01
Supplement: d3ce00882g1.pdf [file d3ce00882g1.pdf]

# Electronic Supplementary Information

## Chloroform-Selective Vapochromic Behavior Based on Crystal-State Host-Guest Complexation of Organic Cage

Zhen-an Cai,<sup>1</sup> Jing Du,<sup>2</sup> Tiefan Huang,<sup>3</sup> Yanjun Ding,<sup>\*1</sup> Mingzai Wu <sup>\*1</sup>

<sup>1</sup>School of Materials Science and Engineering, Anhui University, Hefei 230601, China.

<sup>2</sup>Testing and Analysis Center, Hebei Normal University, Shijiazhuang 050024, China

<sup>3</sup>Functional Membrane Materials Engineering Research Center of Hunan Province, School of Chemistry and Chemical Engineering, Hunan University of Science and Technology, Xiangtan, 411201, China.

## 1. Experimental Procedures

**1.1. Materials.** All chemicals were purchased from commercial sources and used as received.

**1.2. Synthesis of DHTA-Cage.** 2,5-Dihydroxyterephthalaldehyde (99.7 mg; 0.6 mmol) was dissolved in  $\text{CHCl}_3$  (80 mL), then Tren (58.5 mg; 0.4 mmol) in  $\text{CHCl}_3$  (60 mL) was added dropwise over 1 h. The reaction mixture stirred overnight at room temperature. After that, the solvent was evaporated and dried in vacuo to get the crude product in 98% yield. The crude product finally was purified via crystallization from dichloromethane and ethyl ether.  $^1\text{H}$  NMR (400 MHz,  $\text{CDCl}_3$ ):  $\delta$  8.20 (s, 1H), 6.82 (s, 1H), 3.85 (d,  $J$  = 13.2 Hz, 1H), 3.47 (t,  $J$  = 12.7 Hz, 1H), 3.27 (t,  $J$  = 12.6 Hz, 1H), 2.18 (d,  $J$  = 13.4 Hz, 1H);  $^{13}\text{C}$  NMR (101 MHz,  $\text{CDCl}_3$ )  $\delta$  165.93, 151.75, 119.36, 57.44, 53.75. HRMS (ESI) calcd for  $\text{C}_{36}\text{H}_{44}\text{N}_8\text{O}_6\text{Na}$  [(M+Na) $^+$ ]: 705.3125, Found: 705.4144.

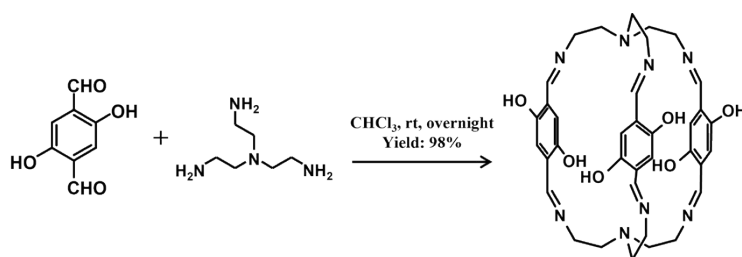

**Scheme S1.** Synthetic scheme of DHTA-Cage.

**1.3. Single Crystal Growth.** Single crystals of the crystalline DHTA-cage 1 were grown by liquid diffusion of diethyl ether into a dichloromethane solution at room temperature. Single crystals of DHTA-cage 2 were obtained by liquid diffusion of acetonitrile into a chloroform solution at room temperature.

**1.4. Vapochromic Experiments.** An open 5 mL vial containing 10 mg of crystalline DHTA-cage 1 was placed in a sealed 20 mL vial containing 1 mL of guest solution. Crystalline DHTA-cage 1 was exposed under saturated vapor pressure in the closed vessel at 25 °C for 12 h. Uptake of guest vapor by DHTA-cage 1 was measured by  $^1\text{H}$  NMR by completely dissolving the crystals in  $\text{CD}_2\text{Cl}_2$ .

**1.5. Adsorption Material Activation.** Crystalline DHTA-cage 1 after adsorption was regenerated to release the adsorbed guests upon heating at 80 °C under vacuum for 4 h.

## 2. Methods

**2.1. Solution NMR.** NMR spectra were recorded on Bruker-400 (400 MHz for  $^1\text{H}$ ; 101 MHz for  $^{13}\text{C}$ ) instruments internally referenced to  $\text{SiMe}_4$  signal.

**2.2. Thermogravimetric Analysis.** Thermogravimetric analysis (TGA) was carried out using a TGA 5500 analyzer (TA Instruments) with an automated vertical overhead thermobalance. The samples were heated at 5 °C/min from 25 to 800 °C using  $\text{N}_2$  as the protective gas.

**2.3. Nitrogen Adsorption Experiment.** Low-pressure gas adsorption measurement was performed using a BeiShiDe 3H-2000PS2 instrument. Samples were degassed under dynamic vacuum for 12 h at 60 °C prior to each measurement.  $\text{N}_2$  isotherms were measured using a liquid nitrogen bath (77 K).

**2.4. Powder X-Ray Diffraction.** Powder X-ray diffraction (PXRD) patterns were obtained using a XRD Bruker D8-ADVANCE X-ray diffractometer (40 KV, 40 mA) with the  $\text{Cu K}\alpha$  radiation ( $\lambda$  = 1.5406 Å). Data were measured over the range of 3–50° in 2°/min steps.

**2.5. Single Crystal X-ray Diffraction.** Single crystal X-ray diffraction data were recorded on a STOE STADIVARI diffractometer with  $\text{Cu K}\alpha$  radiation ( $\lambda$  = 1.54184 Å) at 150 K. All structures were solved with the ShelXT structure solution program using Intrinsic Phasing<sup>[1]</sup> and refined with the ShelXL refinement package using Least Squares minimization<sup>[2]</sup> operated in the OLEX2 interface.<sup>[3]</sup> All non-hydrogen atoms were refined anisotropically. The hydrogen atoms on organic carbon atoms were fixed in calculated positions. Crystal data and structural refinement for DHTA-cage 1 and DHTA-cage 2 are listed in Table S1.

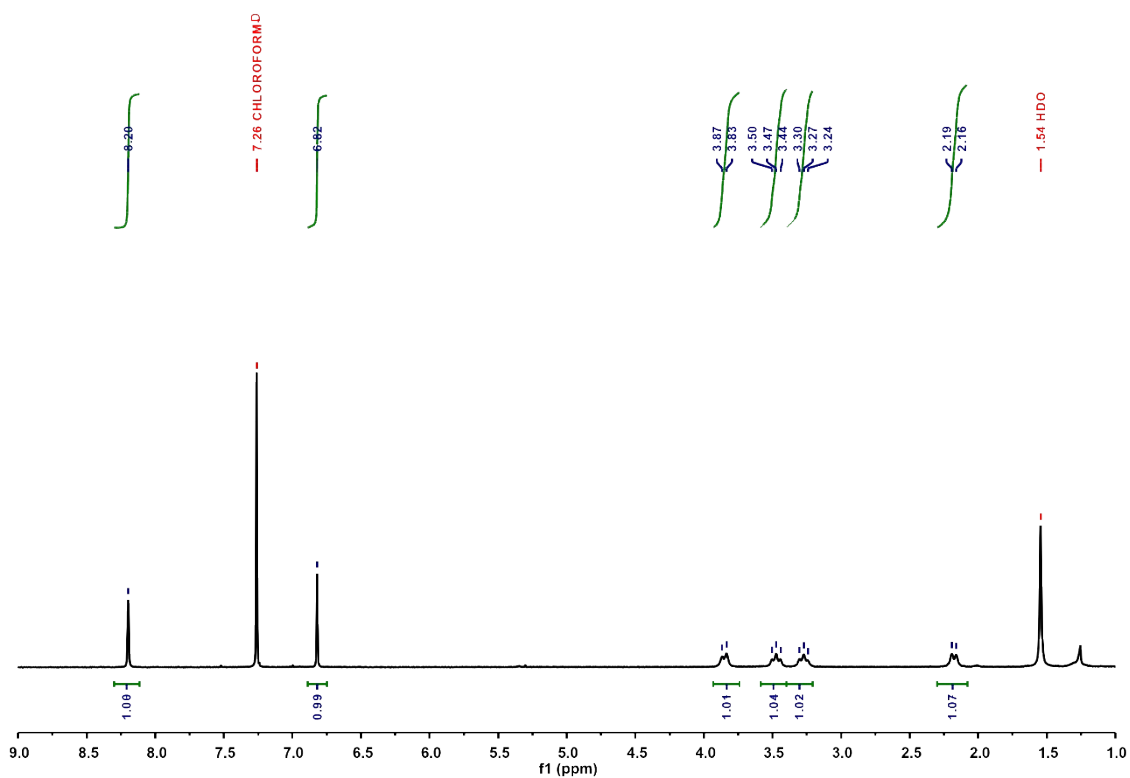

Figure S1.  $^1\text{H}$  NMR spectrum (400 MHz, 298K,  $\text{CDCl}_3$ ) of the **DHTA-cage** (HDO peak comes from trace amount of water in  $\text{CDCl}_3$ ).

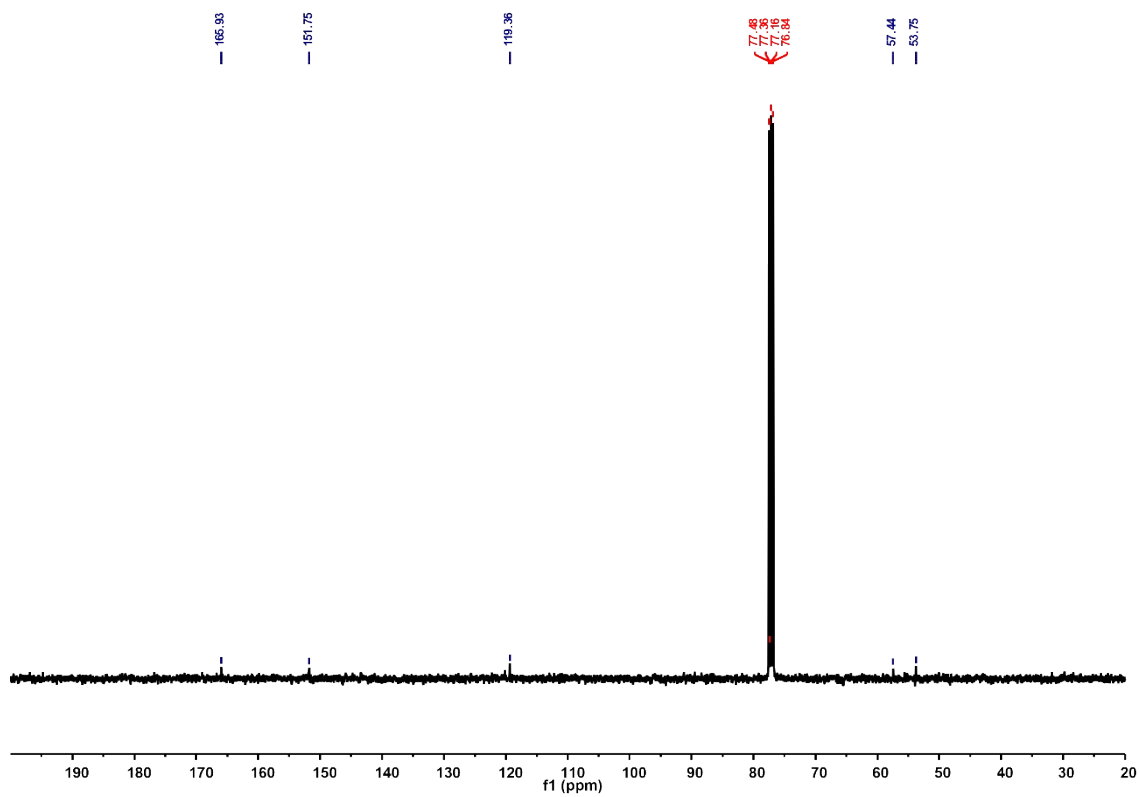

Figure S2.  $^{13}\text{C}$  NMR spectrum (101 MHz, 298K,  $\text{CDCl}_3$ ) of the **DHTA-cage 1**.

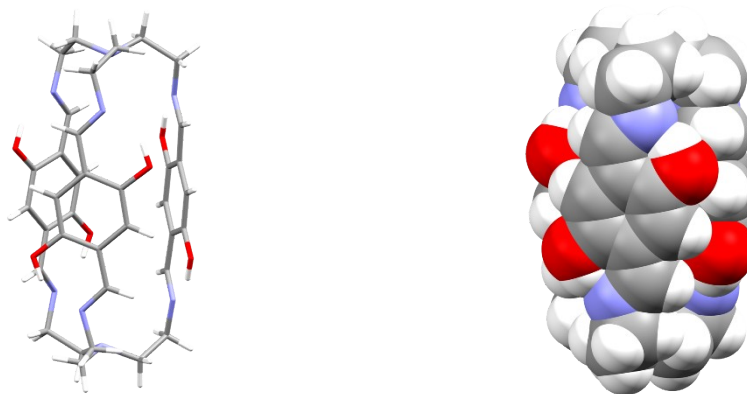

**Figure S3.** Single crystal structure and the space filling structure of crystalline DHTA-cage 1.

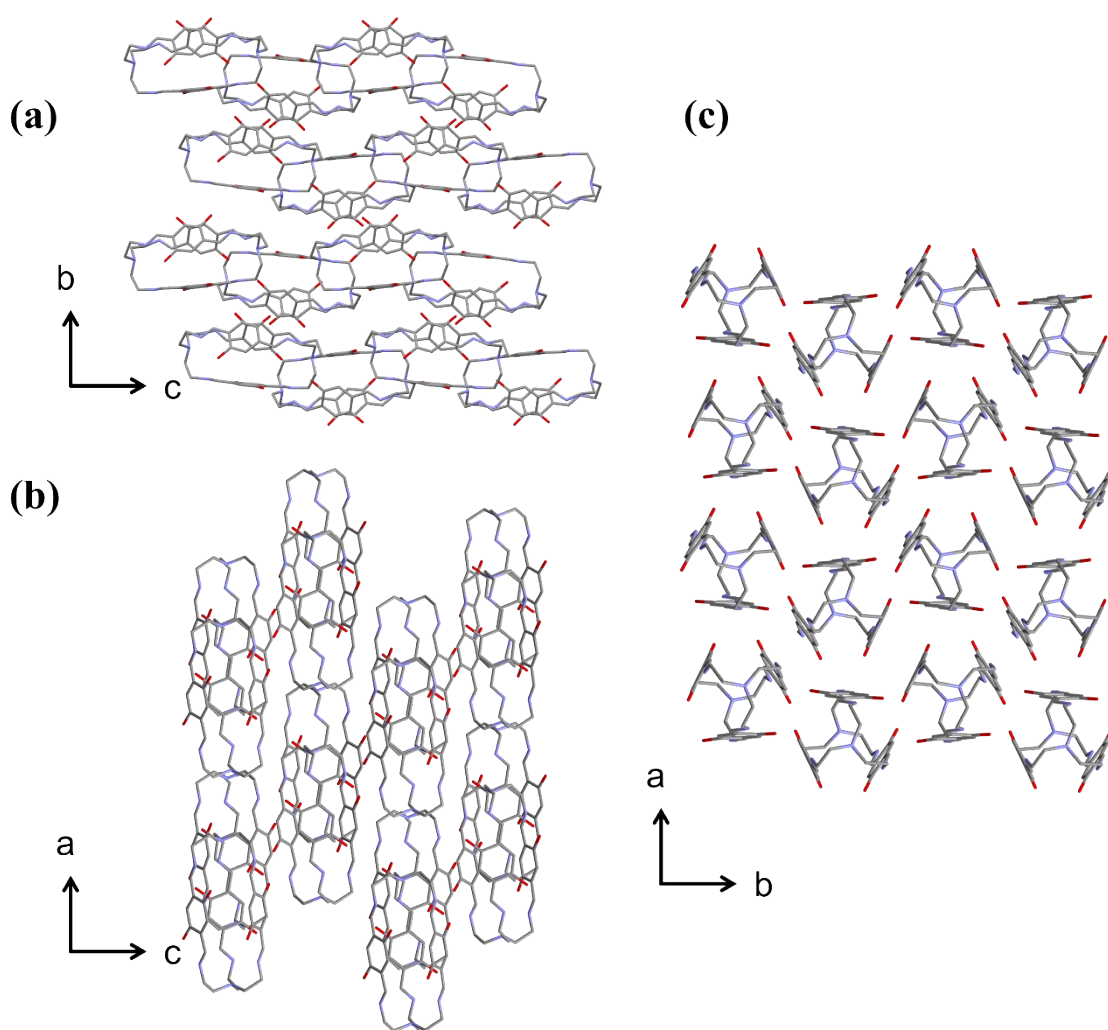

**Figure S4.** Packing arrangement of crystalline DHTA-cage 1 along (a) *a*-axis (b) *b*-axis and (c) *c*-axis.

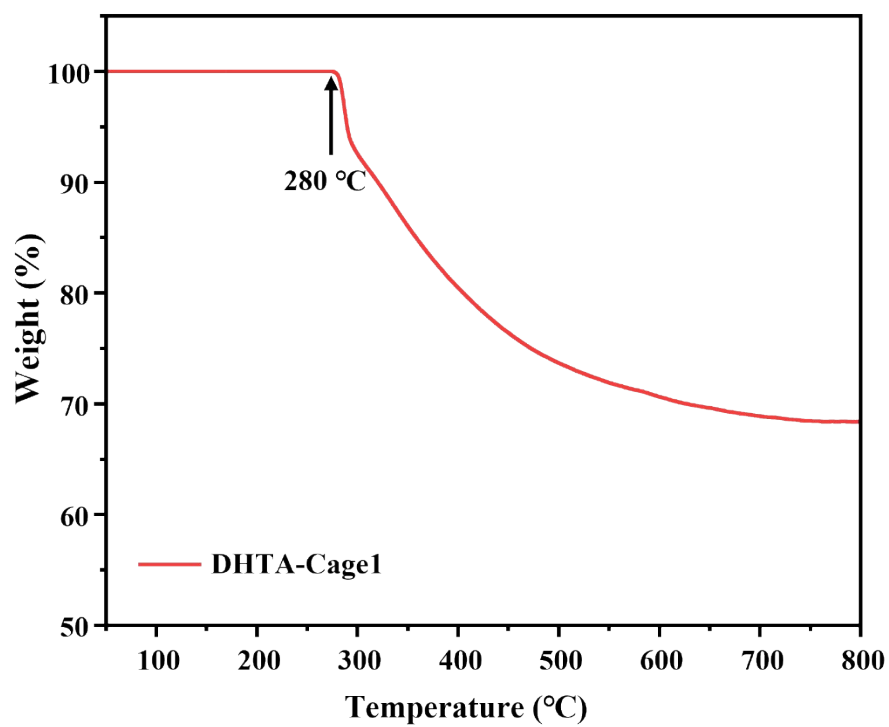

Figure S5. Thermogravimetric analysis: the as synthesized crystalline DHTA-cage 1.

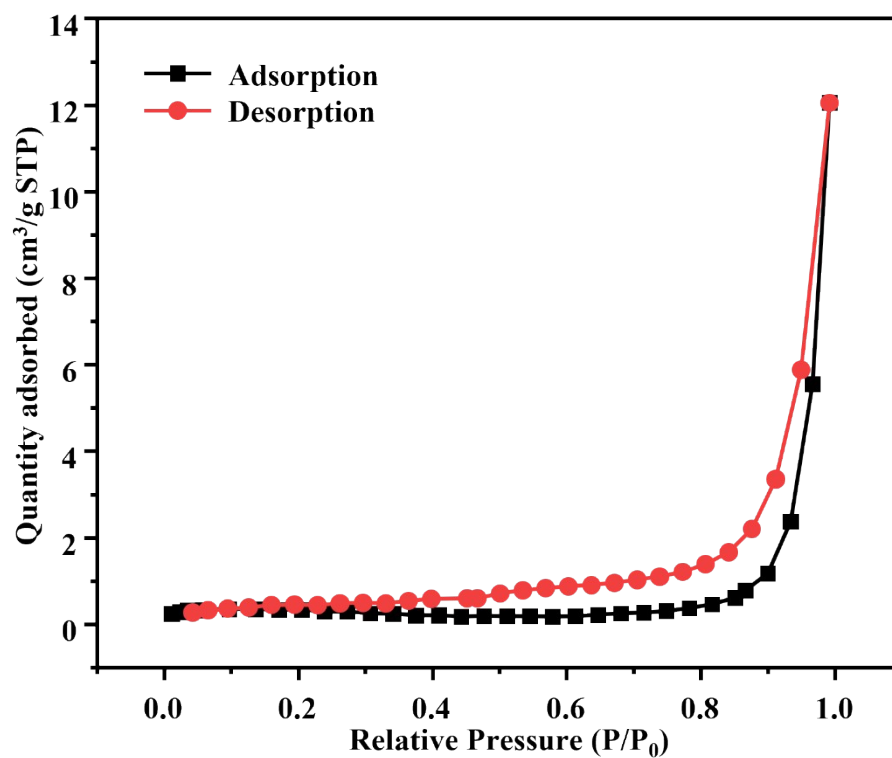

Figure S6. Nitrogen adsorption isotherm at 77 K for crystalline DHTA-cage 1. The calculated BET surface area is 0.8 m²/g.

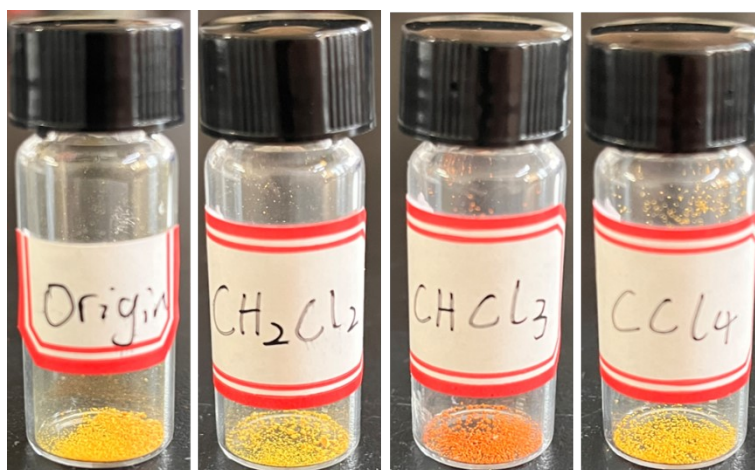

**Figure S7.** Photographs showing the color changes of crystalline DHTA-cage 1 upon exposure to halogenated methane (CH<sub>2</sub>Cl<sub>2</sub>, CHCl<sub>3</sub> and CCl<sub>4</sub>) vapor.

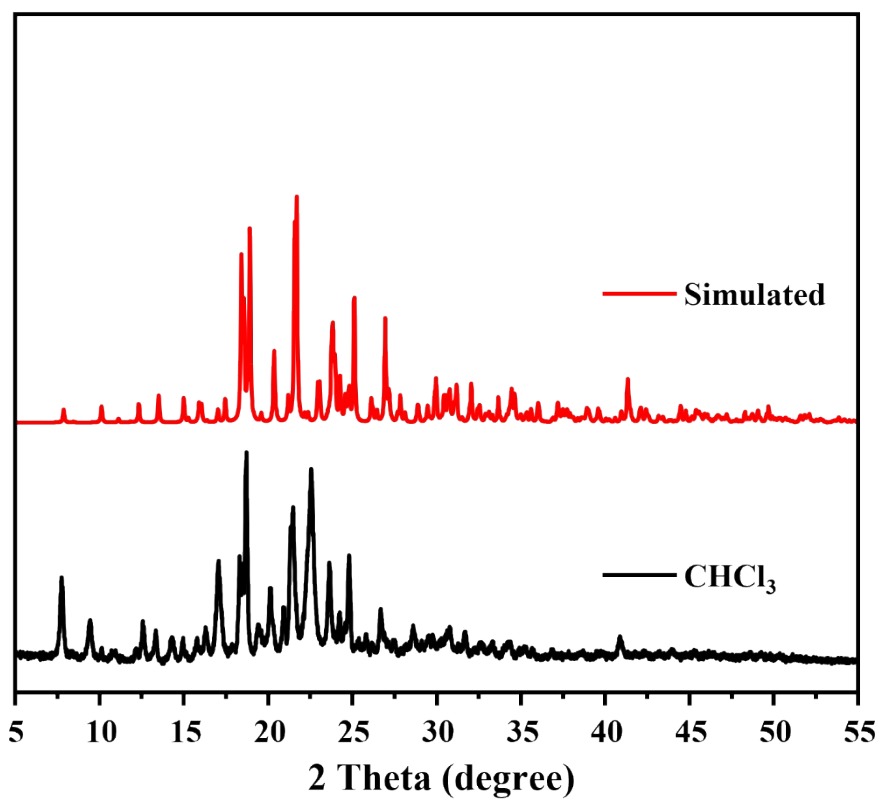

**Figure S8.** PXRD patterns of crystalline DHTA-cage 1 after exposure to chloroform (Black lines) and simulated from X-ray crystal structures of DHTA-cage 2 (Red lines).

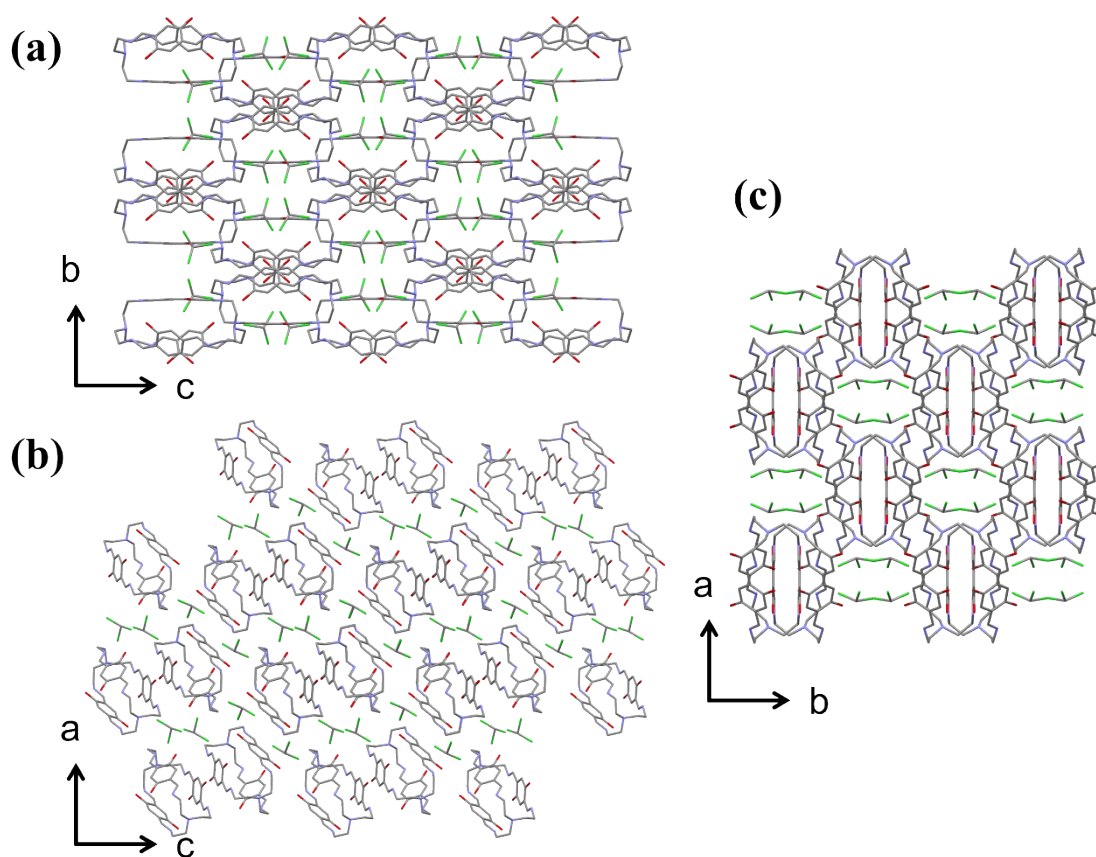

**Figure S9.** Packing arrangement of crystalline DHTA-cage 2 along (a) *a*-axis (b) *b*-axis and (c) *c*-axis.

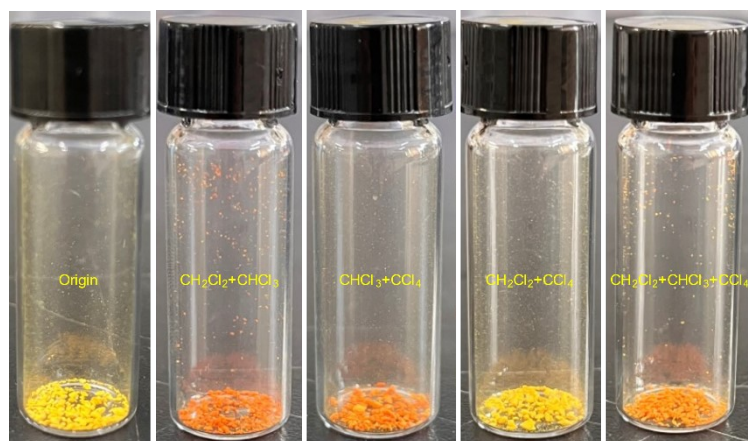

**Figure S10.** Photographs showing the color changes of crystalline DHTA-cage 1 upon exposure to equimolar mixtures of biphasic or tertiary solvent vapor.

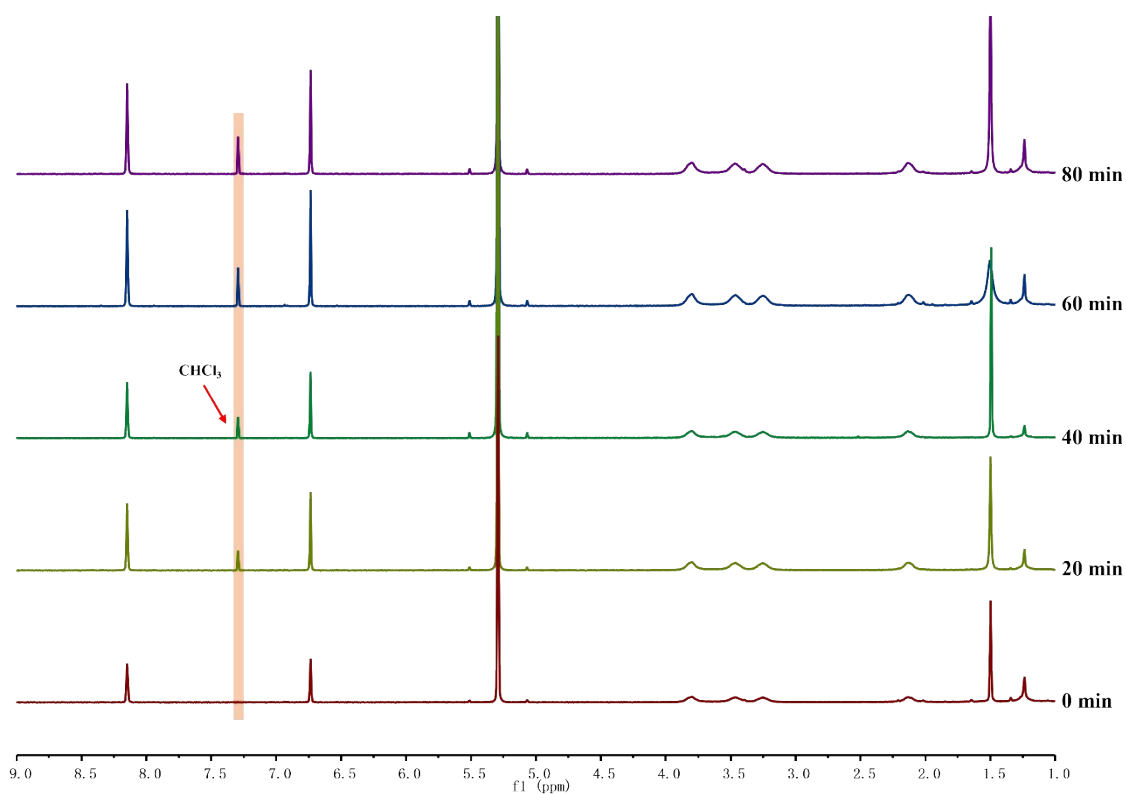

**Figure S11.**  $^1\text{H}$  NMR spectra (400 MHz,  $\text{CD}_2\text{Cl}_2$ , 298 K) of crystalline DHTA-cage 1 after exposure to chloroform over time.

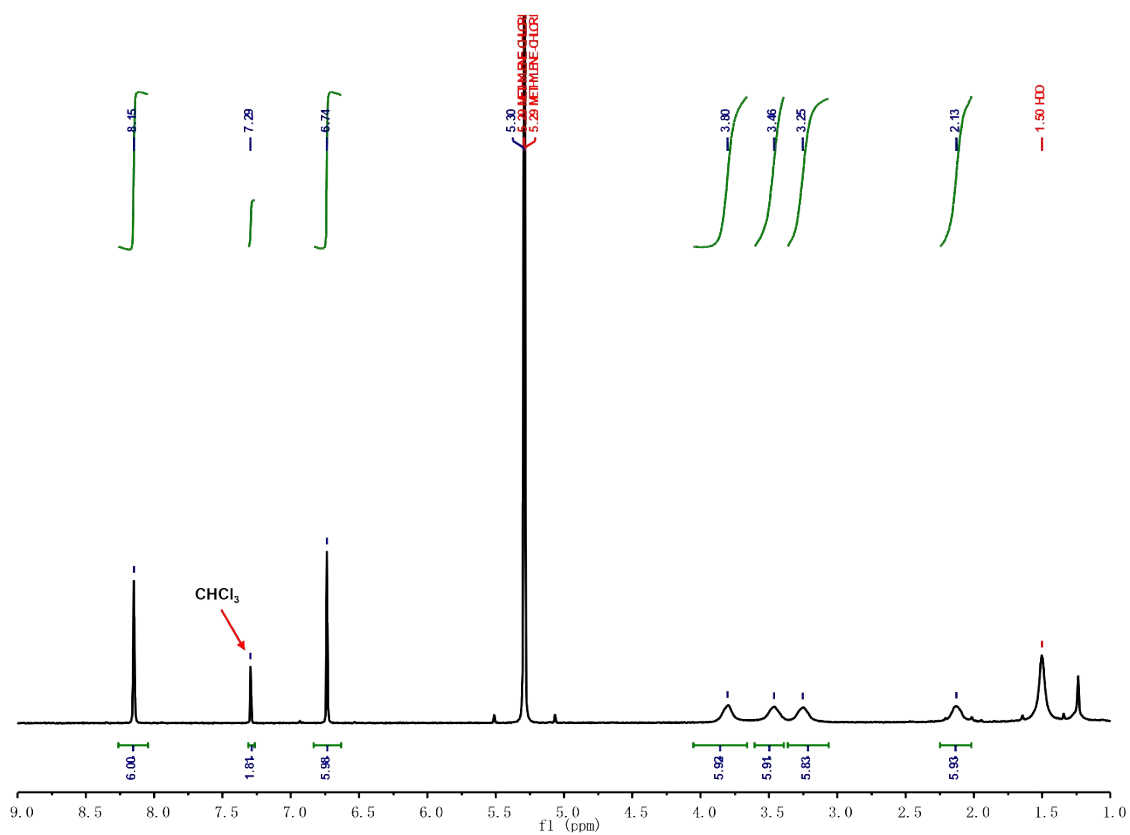

**Figure S12.**  $^1\text{H}$  NMR spectra (400 MHz,  $\text{CD}_2\text{Cl}_2$ , 298 K) of crystalline DHTA-cage 1 after exposure to chloroform at saturation.



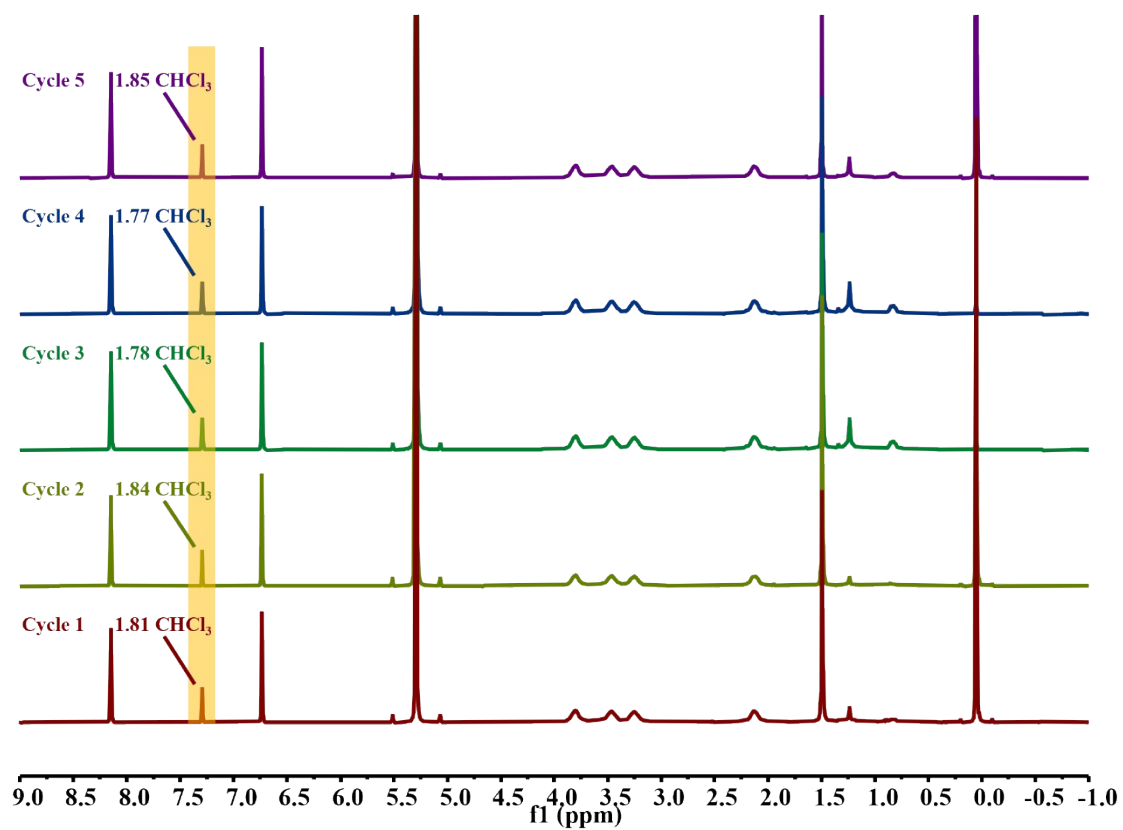

**Figure S13.**  $^1\text{H}$  NMR spectra (400 MHz,  $\text{CD}_2\text{Cl}_2$ , 298 K) of Uptake amounts of crystalline DHTA-cage 1 towards  $\text{CHCl}_3$  molecules in five cycles.

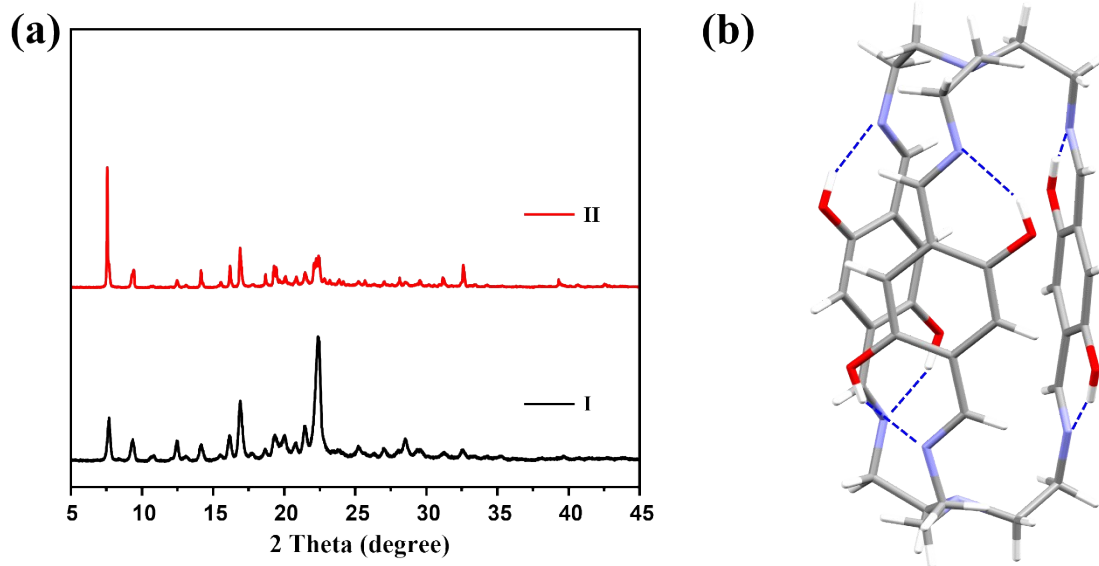

**Figure S14.** (a) Water stability of ( I ) crystalline DHTA-cage 1 and ( II ) crystalline DHTA-cage 1 soaked in boiling water for 24 h. (b) crystal structure of crystalline DHTA-cage 1 showing the hydrogen bonding (Blue lines).

**Table S1.** Experimental single crystal X-ray data.

|                                                                            | <b>DHTA-Cage 1</b>                                                           | <b>DHTA-Cage 2</b>                                                                             |
|----------------------------------------------------------------------------|------------------------------------------------------------------------------|------------------------------------------------------------------------------------------------|
| Identification code                                                        |                                                                              |                                                                                                |
| Empirical formula                                                          | C <sub>36</sub> H <sub>42</sub> N <sub>8</sub> O <sub>6</sub> <sup>a</sup>   | C <sub>36</sub> H <sub>42</sub> N <sub>8</sub> O <sub>6</sub> ·2CHCl <sub>3</sub> <sup>a</sup> |
| Formula weight                                                             | 682.77                                                                       | 921.51                                                                                         |
| Temperature /K                                                             | 150.0                                                                        | 150                                                                                            |
| Crystal system                                                             | Monoclinic                                                                   | Monoclinic                                                                                     |
| Space group                                                                | <i>P</i> 1 2 <sub>1</sub> / <i>n</i> 1                                       | <i>I</i> 1 2/ <i>a</i> 1                                                                       |
| <i>a</i> /Å                                                                | 13.6491(8)                                                                   | 16.4758(8)                                                                                     |
| <i>b</i> /Å                                                                | 16.3995(7)                                                                   | 14.6068(9)                                                                                     |
| <i>c</i> /Å                                                                | 15.8476(9)                                                                   | 19.2419(10)                                                                                    |
| $\alpha$ /°                                                                | 90.00                                                                        | 90.00                                                                                          |
| $\beta$ /°                                                                 | 102.302(5)                                                                   | 114.749(4)                                                                                     |
| $\gamma$ /°                                                                | 90.00                                                                        | 90.00                                                                                          |
| Volume /Å <sup>3</sup>                                                     | 3465.8(3)                                                                    | 4205.4(4)                                                                                      |
| <i>Z</i>                                                                   | 4                                                                            | 4                                                                                              |
| $\rho_{calc}$ g/cm <sup>3</sup>                                            | 1.309                                                                        | 1.455                                                                                          |
| $\mu$ /mm <sup>-1</sup>                                                    | 0.747                                                                        | 4.194                                                                                          |
| <i>F</i> (000)                                                             | 1448                                                                         | 1912                                                                                           |
| Radiation                                                                  | CuK $\alpha$ ( $\lambda$ = 1.54186 Å)                                        | CuK $\alpha$ ( $\lambda$ = 1.54186 Å)                                                          |
| Theta range for data collection/°                                          | 3.89 to 69.44                                                                | 3.94 to 64.9                                                                                   |
| Index ranges                                                               | -13 ≤ <i>h</i> ≤ 16, -8 ≤ <i>k</i> ≤ 19, -18 ≤ <i>l</i> ≤ 13                 | -19 ≤ <i>h</i> ≤ 18, -14 ≤ <i>k</i> ≤ 17, -22 ≤ <i>l</i> ≤ 18                                  |
| Reflections collected                                                      | 13127                                                                        | 7589                                                                                           |
| Independent reflections                                                    | 5729 [ <i>R</i> <sub>int</sub> = 0.0348, <i>R</i> <sub>sigma</sub> = 0.0382] | 3458 [ <i>R</i> <sub>int</sub> = 0.0412, <i>R</i> <sub>sigma</sub> = 0.0344]                   |
| Data/restraints/parameters                                                 | 4231/0/457                                                                   | 2959/0/266                                                                                     |
| Goodness-of-fit on <i>F</i> <sup>2</sup>                                   | 0.952                                                                        | 1.101                                                                                          |
| Final <i>R</i> indexes [ <i>I</i> >= 2 $\sigma$ ( <i>I</i> )] <sup>b</sup> | <i>R</i> <sub>1</sub> = 0.0407, <i>wR</i> <sub>2</sub> = 0.1011              | <i>R</i> <sub>1</sub> = 0.0593, <i>wR</i> <sub>2</sub> = 0.1649                                |
| Final <i>R</i> indexes [all data] <sup>b</sup>                             | <i>R</i> <sub>1</sub> = 0.0607, <i>wR</i> <sub>2</sub> = 0.1075              | <i>R</i> <sub>1</sub> = 0.0675, <i>wR</i> <sub>2</sub> = 0.1720                                |
| CCDC                                                                       | 2287666                                                                      | 2287717                                                                                        |

<sup>a</sup> Formula is given based on single-crystal X-ray data.<sup>b</sup>  $R_1 = \Sigma ||F_o| - |F_c|| / \Sigma |F_o|$ ,  $wR_2 = \{ \Sigma [w(F_o^2 - F_c^2)^2] / \Sigma [w(F_o^2)^2] \}^{1/2}$

## Reference

[1] G. M. Sheldrick, *Acta Crystallogr. C Struct. Chem.* 2015, 71, 3-8.

[2] G. M. Sheldrick, *Acta Cryst.* 2008, A64, 112-122.

[3] O. V. Dolomanov, L. J. Bourhis, R. J. Gildea, J. A. K. Howard, H. Puschmann, *J. Appl. Crystallogr.* 2009, 42, 339-341.
